# Supplementary material
Source: publisher site journal article supplement (https://www.dovepress.com/article/269163)
Supplement: Supplementary file 1 [file get_supplementary_file.php]

**Supplementary Table 1**: Comparison of TRIP-MRI measurements of IRE zone in both normal liver and liver tumor tissues

|  | **Normal Liver** | **Tumor** | **P Values** |
| --- | --- | --- | --- |
| **Area Under Curve analysis** | | |  |
| **30s** | 342 | -0.62 | 0.0770 |
| **60s** | 735 | 91.7 | 0.0668 |
| **90s** | 1176 | 208 | 0.0851 |
| **120s** | 1585 | 343 | 0.102 |
| **150s** | 2074 | 550 | 0.121 |
| **180s** | 2613 | 729 | 0.278 |
| **Semiquantitative** | |  |  |
| **PE** | 17.9 | 11.91 | 0.0410 |
| **TTP** | 256 | 297 | 0.0938 |
| **WIS** | 0.0668 | 0.04 | 0.132 |
| **Tofts Pharmacokinetics Modeling** | | | |
| **Ktrans** | 0.241 | 0.109 | 0.245 |
| **Ve** | 14.0 | 5.88 | 0.191 |
| **Vp** | 2.67 | 1.13 | 0.137 |

**Supplementary Table 2**: Comparison of TRIP-MRI measurements of RE zone in both normal liver and liver tumor tissues

|  | **Normal Liver** | **Tumor** | **P Values** | |
| --- | --- | --- | --- | --- |
| **AUC** |  |  |  |
| **30s** | 1061 | 668 | 0.209 |
| **60s** | 2541 | 1808 | 0.337 |
| **90s** | 3916 | 2959 | 0.420 |
| **120s** | 5383 | 4304 | 0.487 |
| **150s** | 6720 | 4864 | 0.332 |
| **180s** | 8164 | 6896 | 0.368 |
| **Semiquantitative** | |  |  |
| **PE** | 41.6 | 56.6 | 0.294 |
| **TTP** | 73.2 | 93.6 | 0.308 |
| **WIS** | 0.660 | 0.853 | 0.570 |
| **Tofts** |  |  |  |
| **Ktrans** | 0.509 | 1.30 | 0.177 |
| **Ve** | 19.6 | 33.9 | 0.230 |
| **Vp** | 8.24 | 6.07 | 0.337 |

**Supplementary Table 3**: Comparison of TRIP-MRI measurements of untreated zones in both normal liver and liver tumor tissues

| **Untreated** | **Normal Liver** | **Tumor** | **P Values** |
| --- | --- | --- | --- |
| **AUC** |  |  |  |
| **30s** | 2021 | 2344 | 0.882 |
| **60s** | 3805 | 5448 | 0.608 |
| **90s** | 5177 | 8832 | 0.213 |
| **120s** | 6477 | 13263 | 0.228 |
| **150s** | 7569 | 19293 | 0.296 |
| **180s** | 8712 | 23947 | 0.353 |
| **Semiquantitative** | |  |  |
| **PE** | 77.3 | 97.2 | 0.130 |
| **TTP** | 17.2 | 30.7 | 0.025 |
| **WIS** | 0.660 | 3.98 | 0.082 |
| **Tofts** |  |  |  |
| **Ktrans** | 4.68 | 2.56 | 0.245 |
| **Ve** | 22.5 | 26.1 | 0.660 |
| **Vp** | 8.72 | 8.91 | 0.924 |
